# Supplementary material
Source: publisher figshare collection journal article supplement (https://tandf.figshare.com/articles/dataset/_/22294056)
Supplement: Supplementary file 1 [file 1]

## Sheet: Suppl 1. Full extraction table
Author, year	Aim of study	Country	Methodology (Type of study)	Population chracteristics	Sample size	Follow up duration	Administration modality	Solution type	Outcome measures	Summary of findings	Conclusions
Coritsidis G, et al. 2015	To investigate the incidence of electrolyte abnormalities, acute kidney injury, deep venous thrombosis and infections in patients with TBI treated with HTS	USA	Retrospective case series	•adults (The HTS group was younger (44.4 ± 3.3 HTS versus 62 ± 2.7 nHTS years; p = 0.0001) with more males) •GCS>8 (12.8 ± 0.4 versus 13.6 ± 0.2; p < 0.06) •Positive CT scans included •ISS was significantly worse in the nHTS group (13 ± 1.4 versus 18.3 ± 1.3; p = 0.026) while APACHE II scores were similar between both groups (p = 0.285).	92	48 hours	30mL/hour for more than 12 hours titrated to Na between 145 and 155 milliequivalents (mEq)/L	3% HTS vs no HTS	•GCS at 48 hours •ISS at 48 hours •APACHE II at 48 hours •Infection rate and pulmonary infections •Rotterdam score change	•Control group (Non HTS): °GCS was worse in the nHTS group (13.6 ± 0.2 to 12.5 ± 0.5; p = 0.0468). °Rotterdam score (2.4 ± 0.2 to 1.6 ± 0.1; p = 0.0004) °ISS 18.3 ± 1.3 (p = 0.026) °No odds of infection °Overall infections 25% nHTS infections (p= 0.758), and pulmonary infections: 6.6% nHTS (p = 0.6093) •Intervention group (HTS): °GCS in the HTS group remained the same at 48 hours (12.8 ± 0.4 to 1…	•HTS group: non-significant trend towards increased infections and pulomary infections •HTS group: neurological benefits were minimal
Roquilly A, et al. 2021	To determine whether continuous infusion of hypertonic saline solution improves neurological outcome at 6 months in patients with traumatic brain injury.	France	RCT	•Age: 26-65 •GCS*: intervention group: 10 (9-11), control group: 11 (10-11) •Motor response ≤ 5: intervention group 37 (74.0%), control group: 35 (67.3%)	102	6 months	Continuous infusion for 48 hours or longer	20% hypertonic saline solution plus standard care Vs. standard care alone	•Primary Outcome: GOS-E score at 6 months after the trauma •Secondary Outcome: °Mortality at 6 months; GOS-E at 3 months °Post-traumatic amnesia at ICU discharge, 3 months, and 6 months (Galveston Orientation and Amnesia Test <75/100) °Autonomy in activities of daily living at 3 and 6 months (KatzIndex of Independence in Activities of Daily Living >6) °Quality of life: Short Form 36 health survey…	•Control group: °Good neurological outcomes at 3 months : 15/47 (31.9) °Good neurological outcomes at 6 months : 20/49 (40.8) °Patients alive without posttraumatic amnesia : At ICU discharge: 7/50 (14.0), at 3rd month: 17/36 (47.2), at 6 months: 22/39 (56.4) °Independence (Alive and Katz Index > 6): at 3rd month: 34/47 (72.3), at 6th month: 38/48 (79.2) •Intervention group: °Good neurological out…	•In moderate - severe TBI, continuous infusion of 20% HTS compared with standard care did not result in a significantly better neurological status at 6 months. • A trend toward better results in most secondary outcomes was observed in the moderate TBI group •The inclusion of patients with moderate TBI may have decreased the power to demonstrate the effects of continuous infusion of hypertonic sal…
Lumba-BrownA, et al. 2014	To investigate the use of 3% HTS in the acute management of concussion compared with normal saline.	USA	RCT	•23(52%) HTS group, 21 (48%)normal saline group •Children (7-16 years; mean 12, median 13) •GCS>13 and head pain •All with a normal CT scan	44	•Discharge •Two and three days after discharge	10mL/kg over 60 minutes	3% HTS vs normal saline	•Primary Outcome: Self-reported pain using the Wong-Baker FACES Pain Rating Scale °Before administration (FPS1) °Immediately after infusion (FPS2) °After 2-3 days (FPS3). •Secondary Outcome: °Change of pain °Persistent nausea and/or number of emesis, °Other concussive symptoms	°The HTS group had a higher reported mean pain level at FPS1 ((5.7; SD: 2.03) versus NS group (4.29; (SD: 1.82); P = 0.022). °The groups had similar mean pain values at time FPS2 (P = 0.17) and FPS3. °Difference in the mean change of pain from FPS1 to FPS2 between the 2 groups was significant (P < 0.001 and 95% CI ‒0.3 to ‒ 1.4): the HTS group acheaved a greater reduction in pain (difference betw…	•Pediatric concussive pain in healthy patients may be treated acutely with 3% HTS and treatment can result in improvement in patient comfort

## Sheet: Suppl 2. Excluded papers
Authors	Published Year	Exclusion reason	Title
DuBose, J. J.; Kobayashi, L.; Lozornio, A.; Teixeira, P.; Inaba, K.; Lam, L.; Talving, P.; Branco, B.; Demetriades, D.; Rhee, P.	2010	Wrong outcomes	Clinical experience using 5% hypertonic saline as a safe alternative fluid for use in trauma
Dixon, R. R.; Nocera, M.; Zolotor, A. J.; Keenan, H. T.	2016	Wrong outcomes	Intracranial Pressure Monitoring in Infants and Young Children With Traumatic Brain Injury
Bisri, T.; Utomo, B. A.; Fuadi, I.	2016	Wrong comparator	Exogenous lactate infusion improved neurocognitive function of patients with mild traumatic brain injury
Shackford, S. R.; Bourguignon, P. R.; Wald, S. L.; Rogers, F. B.; Osler, T. M.; Clark, D. E.	1998	Wrong comparator	Hypertonic saline resuscitation of patients with head injury: a prospective, randomized clinical trial
Soysal, E.; Horvat, C. M.; Simon, D. W.; Wolf, M. S.; Tyler-Kabara, E.; Gaines, B. A.; Clark, R. S. B.; Kochanek, P. M.; Bayir, H.	2021	Wrong language	Clinical Deterioration and Neurocritical Care Utilization in Pediatric Patients With Glasgow Coma Scale Score of 9-13 After Traumatic Brain Injury: Associations With Patient and Injury Characteristics
Monje, M. J. G.; Farina, M. M.; Cortes, P. V.; Fernandez, V. A.; Besteiro, G. B.; Galeiras, R.; Benavent, J. P.; Moar, D. F.; Jimenez, P.	2009	Wrong comparator	Prognosis factors related to a better outcome in moderate and severe traumatic brain injury
Farley, P.; Salisbury, D.; Murfee, J. R.; Buckley, C. T.; Taylor, C. N.; Doll, A.; Polite, N. M.; Mbaka, M. I.; Kinnard, C. M.; Butts, C. C.; Simmons, J. D.; Lee, Y. L. L.	2022	Duplicate	The Relationship between Serum Sodium, Serum Osmolality, and Intracranial Pressure in Patients with Traumatic Brain Injury Treated with Hyperosmolar Therapy
Skrifvars, M.; Bailey, M.; Martensson, J.; Moore, E.; French, C.; Presneill, J.; Nichol, A.; Little, L.; Duranteau, J.; Huet, O.; Haddad, S.; Arabi, Y.; McArthur, C.; Anstey, J.; Bellomo, R.	2018	Wrong language	Association between use of mannitol and hypertonic saline on mortality in patients with moderate to severe traumatic brain injury
Tan, P.; Dean, H.; Kinsey, A.; Schinco, M. A.	2007	Wrong outcomes	Compare the use of 23.4% sodium chloride (HTS) and mannitol for intracranial pressure (ICP) following traumatic brain injury
Chong, Shu-Ling; Dang, Hongxing; Ming, Meixiu; Mahmood, Maznisah; Zheng, Charles Q. S.; Gan, Chin Seng; Lee, Olive P. E.; Ji, Jian; Chan, Lawrence C. N.; Ong, Jacqueline S. M.; Kurosawa, Hiroshi; Lee, Jan Hau	2021	Wrong patient population	Traumatic Brain Injury Outcomes in 10 Asian Pediatric ICUs: A Pediatric Acute and Critical Care Medicine Asian Network Retrospective Study
Wade, C. E.; Grady, J. J.; Kramer, G. C.; Younes, R. N.; Gehlsen, K.; Holcroft, J. W.	1997	Wrong comparator	Individual patient cohort analysis of the efficacy of hypertonic saline/dextran in patients with traumatic brain injury and hypotension
Saritas Nakip, O.; Kesici, S.; Pektezel, M.; Bayrakci, B.	2021	Wrong comparator	The effect of hypertonic saline on increased intracranial pressure in traumatic brain injury: Prospective study with non-invasive method
Elliott, M. B.	2005	Wrong study design	Fluid therapies for traumatic brain injury
Grimaldi, C.; Michel, F.	2017	Wrong language or not found	Place of hypertonic saline solution in paediatric intensive care
Grimmer, N.; Tesoro, E.	2014	Wrong comparator	Treatment with hypertonic saline alternating with mannitol in neurologic emergencies
Kumar, A.; Carrillo, L. A.; Bell, C.; Pedroza, C.; Jackson, M.; Cardenas, F.; Skibber, M.; Cox, C. S.	2019	Wrong language or not found	Modified PILOT Score for Pediatric Traumatic Brain Injury: Effect of Hypertonic Saline
Farley, P.; Salisbury, D.; Murfee, J. R.; Buckley, C. T.; Taylor, C. N.; Doll, A.; Polite, N. M.; Mbaka, M. I.; Kinnard, C. M.; Butts, C. C.; Simmons, J. D.; Lee, Y. L.	2021	Wrong comparator	The Relationship between Serum Sodium, Serum Osmolality, and Intracranial Pressure in Patients with Traumatic Brain Injury Treated with Hyperosmolar Therapy
Fisher, B.; Thomas, D.; Peterson, B.	1992	Wrong patient population	Hypertonic saline lowers raised intracranial pressure in children after head trauma
Brown, M.; Jones, A.; Newman, D.	2016	Wrong study design	Does Mannitol Reduce Mortality From Traumatic Brain Injury?
Attari, M. A.; Amirmijani, H.; Khalili, G.	2016	Wrong language or not found	Evaluation of the various methods of fluid resuscitation in concussion and its relationship with patient outcomes. [Persian]
Quintard, H.; Meyfroidt, G.; Citerio, G.	2020	Wrong comparator	Hyperosmolar Agents for TBI: All Are Equal, But Some Are More Equal Than Others?
Erdman, M.; Curl, S.; Haver, C.; Busey, K.	2019	Wrong comparator	Impact of moderate hyperchloremia on traumatic brain injury patients treated with continuous infusion hypertonic saline
Donepudi, B.; Berger, A.; Slampak, A.; Mehta, Y.	2022	Wrong comparator	Continuous Infusion Vs Intermittent Doses of Hypertonic Saline in the Management of Cerebral Edema: Time to Reach the Target Sodium Concentration
Ragsdale, C.; Hatfield, L.; Leong, T.; Vats, A.	2011	Wrong comparator	How do hypertonic saline and mannitol compare in the management of elevated intracranial pressure in pediatric traumatic brain injury?
Boyer, J.; Morgan, D.; Clark, K.; Ross, M.; Smelser, J.	2009	Wrong comparator	Evaluation of the efficacy and safety of 7.5% sodium chloride boluses for elevated intracranial pressure in infants and children
Hartl, R.; Froelich, M.	2008	Wrong comparator	Mannitol and hypertonic saline: Going head to head
Nagumo, M. M.; Teixeira, M. J.; Paiva, W. S.	2017	Wrong comparator	Pediatric traumatic brain injury: discussion about hyperosmolar therapy
Ligier, B.; Abou-Madi, M.; Trop, D.; Ravussin, P.	1988	Wrong comparator	Observations on the early response of intracranial hypertension to mannitol. [French]
Li, Min; Chen, Tao; Chen, Shu-da; Cai, Jing; Hu, Ying-Hong	2015	Wrong patient population	Comparison of equimolar doses of mannitol and hypertonic saline for the treatment of elevated intracranial pressure after traumatic brain injury: a systematic review and meta-analysis
Biestro, A.; Alberti, R.; Galli, R.; Cancela, M.; Soca, A.; Panzardo, H.; Borovich, B.	1997	Wrong comparator	Osmotherapy for increased intracranial pressure: comparison between mannitol and glycerol
Francony, G.; Fauvage, B.; Falcon, D.; Canet, C.; Dilou, H.; Lavagne, P.; Jacquot, C.; Payen, J. F.	2008	Wrong comparator	Equimolar doses of mannitol and hypertonic saline in the treatment of increased intracranial pressure
Yildizdas, D.; Altunbasak, S.; Celik, U.; Herguner, O.	2006	Wrong comparator	Hypertonic saline treatment in children with cerebral edema
Benardete, E. A.	2012	Wrong comparator	Hyperosmolar therapy for raised intracranial pressure
Avakov, V.; Ibragimov, N.; Murotov, T. M.; Kenzhaev, L.; Djumabaev, R.	2020	Wrong comparator	Pathophysiology and differentiated hyperosmolary therapy in cerebral edema in patients with craniocerebral injury
Bennett, T. D.; Statler, K. D.; Korgenski, E. K.; Bratton, S. L.	2012	Wrong comparator	Osmolar therapy in pediatric traumatic brain injury
Piper, B. J.; Harrigan, P. W.	2015	Wrong comparator	Hypertonic saline in paediatric traumatic brain injury: a review of nine years' experience with 23.4% hypertonic saline as standard hyperosmolar therapy
Gaibino, N.; Medeiros, I. C.; Mota, P.; Fernandes, S. M.; Moniz, I.; Ribeiro, J.	2021	Wrong outcomes	Sodium homeostasis in patients with traumatic brain injury and its impact on mortality
Battison, C.; Andrews, P. J.; Graham, C.; Petty, T.	2005	Wrong patient population	Randomized, controlled trial on the effect of a 20% mannitol solution and a 7.5% saline/6% dextran solution on increased intracranial pressure after brain injury
Rivera-Lara, L.; Muehlschlegel, S.; Kroll-Desrosiers, A.; Carandang, R.; Ouillette, C.; Hall, W.; Anderson, F.; Barton, B.; Goldberg, R.	2012	Wrong outcomes	The impact of elevated serum sodium on outcome in moderate-severe traumatic brain injury
Dunham, C. M.; Malik, R. J.; Huang, G. S.; Kohli, C. M.; Brocker, B. P.; Ugokwe, K. T.	2018	Wrong patient population	Hypertonic saline administration and complex traumatic brain injury outcomes: a retrospective study
Anonymous	2016	Wrong comparator	Erratum: Comparison of Equimolar Doses of Mannitol and Hypertonic Saline for the Treatment of Elevated Intracranial Pressure after Traumatic Brain Injury: A Systematic Review and Meta-Analysis (Medicine 94:17 (e736))
Brussel, T.	1997	Wrong study design	Osmotherapy in cerebral trauma
Li, M.; Chen, T.; Chen, S. D.	2016	Wrong comparator	Comparison of Equimolar Doses of Mannitol and Hypertonic Saline for the Treatment of Elevated Intracranial Pressure After Traumatic Brain Injury: A Systematic Review and Meta-Analysis (vol 94, e736, 2015)
Chapman, S. A.; Irwin, E. D.; Thunselle, M.; Ronk, A.; Reicks, P.; Curran, B.; Rangarajan, K.; Tam, H.; Beilman, G. J.	2018	Wrong patient population	Serum sodium response to hypertonic saline infusion therapy in traumatic brain injury
Chapman, S.; Ronk, A.; Irwin, E.; Reicks, P.; Rangarajan, K.; Tam, H.	2015	Wrong patient population	Urine sodium excretion and serum sodium changes with hypertonic saline for traumatic brain injury
Desai, A.; Damani, R.	2021	Wrong study design	Hyperosmolar therapy: A century of treating cerebral edema
Froelich, M.; Hartl, R.	2008	Wrong study design	Ultra-early hyperosmolar treatment in traumatic brain injury: Will surgery soon be old-school?
Cheng, F.; Xu, M.; Liu, H.; Wang, W.; Wang, Z.	2018	Wrong comparator	A Retrospective Study of Intracranial Pressure in Head-Injured Patients Undergoing Decompressive Craniectomy: A Comparison of Hypertonic Saline and Mannitol
Deora, H.; Shukla, D.	2021	Wrong comparator	Sugar or Salt? Survey on the Use of Mannitol or Hypertonic Saline for Cerebral Edema Due to Traumatic Brain Injury
Rivera-Lara, L.; Carandang, R.; Hall, W.; Ouillette, C.; Anderson, F. A.; Goldberg, R. J.; Muehlschlegel, S.	2012	Wrong comparator	Serum sodium values and their association with adverse outcomes in moderate-severe traumatic brain injury (TBI)
Lewandowski-Belfer, J. J.; Patel, A. V.; Darracott, R. M.; Jackson, D. A.; Nordeen, J. D.; Freeman, W. D.	2014	Wrong comparator	Safety and efficacy of repeated doses of 14.6 or 23.4 % hypertonic saline for refractory intracranial hypertension
Infanti, J. L.	2008	Wrong comparator	Challenging the gold standard: should mannitol remain our first-line defense against intracranial hypertension?
Gonda, D. D.; Meltzer, H. S.; Crawford, J. R.; Hilfiker, M. L.; Shellington, D. K.; Peterson, B. M.; Levy, M. L.	2013	Wrong comparator	Complications Associated With Prolonged Hypertonic Saline Therapy in Children With Elevated Intracranial Pressure
Levin, A. B.; Duff, T. A.; Javid, M. J.	1979	Wrong comparator	Treatment of increased intracranial pressure: A comparison of different hyperosmotic agents and the use of thiopental
Rowell, S. E.; Fair, K. A.; Barbosa, R. R.; Watters, J. M.; Bulger, E. M.; Holcomb, J. B.; Cohen, M. J.; Rahbar, M. H.; Fox, E. E.; Schreiber, M. A.	2016	Wrong comparator	The Impact of Pre-Hospital Administration of Lactated Ringer's Solution versus Normal Saline in Patients with Traumatic Brain Injury
Levine, J. M.	2006	Wrong study design	Hypertonic saline for the treatment of intracranial hypertension: Worth its salt
Li, Y.; Li, Z.; Li, M.; Yang, Y.; Wang, B.; Gao, L.; Zhang, X.; Cheng, H.; Fang, W.; Zhao, B.; Gao, G.; Li, L.	2015	Wrong comparator	Efficacy and Safety of Continuous Micro-Pump Infusion of 3% Hypertonic Saline combined with Furosemide to Control Elevated Intracranial Pressure
Koffman, L.; Ahrens, C.; Koenig, M.; Chalela, J. A.; Asai, S.; Neyens, R.; Gomes, J.	2014	Wrong comparator	Weight-based dose-response curve of HTS versus mannitol in the management of elevated ICP
Winer, A.; Demeure, D.; Moren, J.; Pinaud, M.	1999	Wrong comparator	Controlled hypernatremia: An alternative to mannitol in cranial trauma-related intracranial hypertension?
Birrer, K. L.	2007	Wrong comparator	Use of hypertonic 7.5% sodium chloride (NaCl) solution in patients with traumatic brain injuries
Willie, J.; Dacey, R. G.	2009	Wrong patient population	HYPERTONIC SALINE AND ITS EFFECT ON INTRACRANIAL PRESSURE, CEREBRAL PERFUSION PRESSURE, AND BRAIN TISSUE OXYGEN COMMENTS
Lazaridis, C.; Neyens, R.; Bodle, J.; DeSantis, S. M.	2013	Wrong comparator	High-osmolarity saline in neurocritical care: systematic review and meta-analysis
Shao, L. J.; Hong, F. X.; Zou, Y.; Hao, X. F.; Hou, H. J.; Tian, M.	2015	Wrong comparator	Hypertonic Saline for Brain Relaxation and Intracranial Pressure in Patients Undergoing Neurosurgical Procedures: A Meta-Analysis of Randomized Controlled Trials
Ali, T.; Monkhouse, A.; Madder, H.	2013	Wrong outcomes	A novel hypertonic saline infusion regime for the treatment of intracranial hypertension following traumatic brain injury
Bhardwaj, A.; Ulatowski, J. A.	2004	Wrong study design	Hypertonic saline solutions in brain injury
Wang, H.; Cao, H.; Zhang, X.; Ge, L.; Bie, L.	2017	Wrong comparator	The effect of hypertonic saline and mannitol on coagulation in moderate traumatic brain injury patients
Berger, S.; Schurer, L.; Hartl, R.; Deisbock, T.; Dautermann, C.; Murr, R.; Messmer, K.; Baethmann, A.	1993	Wrong patient population	7.2-PERCENT NACL 10-PERCENT DEXTRAN-60 VERSUS 20-PERCENT MANNITOL FOR TREATMENT OF INTRACRANIAL HYPERTENSION
McKinney, S.; Abramo, T.; Albert, G.; Maxson, T.; Hu, Z.	2016	Wrong comparator	Cerebral oximetry in non-intubated pediatric isolated traumatic brain injury patients receiving 3% hypertonic saline
Tsubokawa, T.; Katayama, Y.; Ishii, S.	1989	Wrong patient population	Fructose-added glycerol (Glyceol) for therapy of elevated intracranial pressure: Analysis of the side effects of long-term administration in a multi-institutional trial
Defillo, A.; Rockswold, G. L.; Jancik, I.; Rockswold, S. B.	2006	Wrong patient population	Hypertonic saline (HTS) and its effect on intracranial pressure (ICP) and brain tissue oxygen (PtO2)
Parizh, D.; Parizh, I.; Kuwata, C.; Glinik, G.; Kopatsis, A.	2016	Wrong comparator	Traumatic Brain Injury: Bolus Versus Continuous Infusion of 3% Hypertonic Saline
Khanna, S.; Davis, D.; Peterson, B.; Fisher, B.; Tung, H.; O'Quigley, J.; Deutsch, R.	2000	Wrong patient population	Use of hypertonic saline in the treatment of severe refractory posttraumatic intracranial hypertension in pediatric traumatic brain injury
Yang, X.; Chen, Y.; Li, J.; Chen, L.; Ren, H.; Liu, Y.; Zhang, X.	2019	Wrong comparator	Hypertonic saline maintains coagulofibrinolytic homeostasis following moderate-to-severe traumatic brain injury by regulating monocyte phenotype via expression of lncRNAs
Valadka, A. B.; Robertson, C. S.	2000	Wrong study design	Should we be using hypertonic saline to treat intracranial hypertension?
Khanna, S. K.; Davis, D.; Fisher, B.; Peterson, B.	1998	Wrong patient population	Use of hypertonic saline (3%nacl) in the treatment of resistant intracranial hypertension in pediatric head injured patients
Rosales, M.; Laxamana, L.	2014	Wrong comparator	Comparison of mannitol versus hypertonic solutions in the treatment of acute cerebral edema
Taylor, S.; Smith, E.; Haan, J.; Yates, C.; Dong, F.	2011	Wrong comparator	Hypertonic saline in traumatic brain injury: Bolus vs. continuous infusion effect on intracranial pressure
Cao, C.; Peng, X.; Yu, X.; Wang, M.; Luo, Z.; Yue, S.	2014	Wrong comparator	Comparison of 3% NACL and 20% mannitol in the treatment of increased intracranial pressure in neonatal patients
Upadhyay, P.; Tripathi, V. N.; Singh, R. P.; Sachan, D.	2010	Wrong comparator	Role of hypertonic saline and mannitol in the management of raised intracranial pressure in children: A randomized comparative study
Doyle, J. A.; Davis, D. P.; Hoyt, D. B.	2001	Wrong study design	The use of hypertonic saline in the treatment of traumatic brain injury
Cummings, B. M.; Fernandes, N. D.; Parker, L. F.; Murphy, S. A.; Yager, P. H.	2020	Wrong comparator	Standardized Volume Dosing Protocol of 23.4% Hypertonic Saline for Pediatric Critical Care: Initial Experience
Carter, C.; Human, T.	2017	Wrong comparator	Efficacy, Safety, and Timing of 5% Sodium Chloride Compared With 23.4% Sodium Chloride for Osmotic Therapy
Rickard, A.	2011	Wrong comparator	Hypertonic sodium solutions versus mannitol in reducing ICP in traumatic brain injury
Roquilly, A.; Mahe, P. J.; Latte, D. D.; Loutrel, O.; Champin, P.; Di Falco, C.; Courbe, A.; Buffenoir, K.; Hamel, O.; Lejus, C.; Sebille, V.; Asehnoune, K.	2011	Wrong patient population	Continuous controlled-infusion of hypertonic saline solution in traumatic brain-injured patients: a 9-year retrospective study
Chen, H.; Song, Z.; Dennis, J. A.	2021	Wrong comparator	Hypertonic saline versus other intracranial pressure-lowering agents for people with acute traumatic brain injury. [Spanish]
Tatro, H. A.; McMillen, J. C.; Hamilton, L. A.; Rowe, A. S.	2021	Wrong comparator	23.4% Sodium Chloride Versus Mannitol for the Reduction of Intracranial Pressure in Patients With Traumatic Brain Injury: A Single-Center Retrospective Cohort Study
Siddiqui, E. U.; Waheed, S.; Perveen, F.; Daniyal, M.; Khan, M. A. R.; Siddiqui, S.; Siddiqui, Z.	2019	Wrong comparator	Clinical outcome of paediatric patients with traumatic brain injury (TBI) receiving 3% hypertonic saline (HTS) in the emergency room of a tertiary care hospital
Scott, S.; Ewert, S.; Greenwell, C.; Tweed, J.; Baumgartner, K.; Knapp, J.; Raman, L.	2015	Wrong comparator	A randomized trial comparing 3% to 23% hypertonic saline in pediatric TBI: A pilot study
Niknam, K.; Mistry, R.; Lumba-Brown, A.	2019	Wrong study design	Pediatric hypertonic saline use in emergency departments
Gao, L.; Jin, Y.; Wu, X.; Hu, J.; Mao, Y.; Zhou, L.	2011	Wrong comparator	Management and prognosis for 127 patients with traumatic bifrontal contusions
Vats, A.; Chambliss, C. R.; Anand, K. J. S.; Pettignano, R.	1999	Wrong patient population	Is hypertonic saline an effective alternative to mannitol in the treatment of elevated intracranial pressure in pediatric patients?
Wellard, J.; Kuwabara, M.; Adelson, P. D.; Appavu, B.	2021	Wrong patient population	Physiologic Characteristics of Hyperosmolar Therapy After Pediatric Traumatic Brain Injury
Taranova, II; Kokhno, V. N.	2010	Wrong language or not found	[Brain edema treatment procedure using continuous controlled infusion of mannitol in neurosurgical patients]
Williams, E.; von Fintel, N.	2012	Wrong study design	Hypertonic saline: a change of practice
Wenham, T. N.; Hormis, A. P.; Andrzejowski, J. C.	2008	Wrong comparator	Hypertonic saline after traumatic brain injury in UK neuro-critical care practice
Cummings, B.; Parker, L.; Murphy, S.; Noviski, N.	2015	Wrong comparator	Initial experience with 23% hypertonic saline for cerebral edema in pediatric intensive care
MacDonald, J. T.; Uden, D. L.	1982	Wrong patient population	Intravenous glycerol and mannitol therapy in children with intracranial hypertension
Freeman, N.; Welbourne, J.	2018	Wrong study design	Osmotherapy: science and evidence-based practice
Schrot, R. J.; Muizelaar, J. P.	2002	Wrong study design	Mannitol in acute traumatic brain injury
Shats, D. M.; Ovchinnikova, L. F.	1972	Wrong language or not found	[Use of glycerin in the treatment of increased intracranial pressure in craniocerebral injuries]
Wardoyo, M. S.; Widodo, D.; Ihwan, A.; Prihantono; Kusuma, M. I.; Hendarto, J.; Adhimarta, W.; Nasrullah; Faruk, M.; Islam, A. A.	2021	Wrong comparator	The relationship between different dosages of mannitol 20% and osmolarity, blood sugar serum, and coagulation factors in moderate brain injury patients with increased intracranial pressure
Malik Nizomovich, M. T.; Ervandovich, A. V.; Abdurahmon o'g'li, B. H.; Shukir o'g'li, S. O.; G'Ayrat o'g'li M, I.	2020	Wrong patient population	The effect of hypertonic saline solution (7%) on intracranial pressure and cerebral perfusion pressure in patients with isolated traumatic brain injury

## Sheet: Other suppl tables
Suppl Table 3. Country of study and World Bank Index
Country/ies	World Bank Index (2016 GNI)	Number of Studies
United States	High Income Country	2
France	High Income Country	1
Suppl Table 4. Journal frequency and impact factor
Journal	Count	IF
J Clin Neurosci.	1	2022-01-02
JAMA	1	157.3
Pediatr Emerg Care	1	2022-06-01
